# Supplementary material for: Faecal Microbiota Composition in Adults Is Associated with the FUT2 Gene Determining the Secretor Status
Source: PLOS journal article supplement (doi:10.1371/journal.pone.0094863), 2014-04-14
Supplement: S8 (10.1371/journal.pone.0094863.s008) [file journal.pone.0094863.s008]

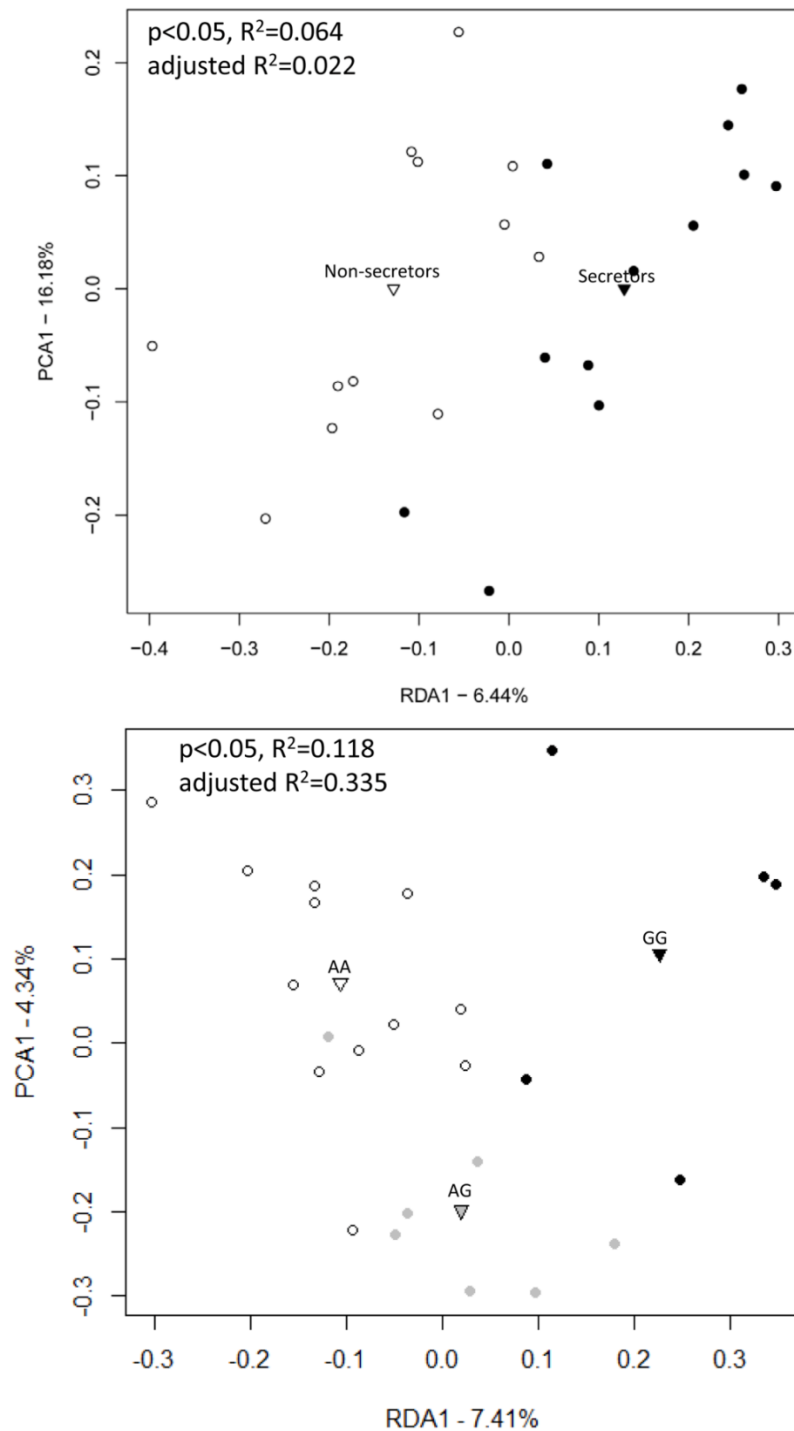

**Figure S8. RDA plot of intestinal microbiota compositions in the non-secretors (white) and the secretors (black) (A) and among individuals with the *FUT2* genotypes AA (white), AG (grey) and GG (black) (B).** Plots were based on Hellinger transformed level 3/species-like taxa obtained by HITChip analysis. The triangles indicate centroids of the study groups. P-values show statistical significance in ANOVA test.
