# Supplementary material for: Faecal Microbiota Composition in Adults Is Associated with the FUT2 Gene Determining the Secretor Status
Source: PLOS journal article supplement (doi:10.1371/journal.pone.0094863), 2014-04-14
Supplement: S10 (10.1371/journal.pone.0094863.s010) [file journal.pone.0094863.s010]

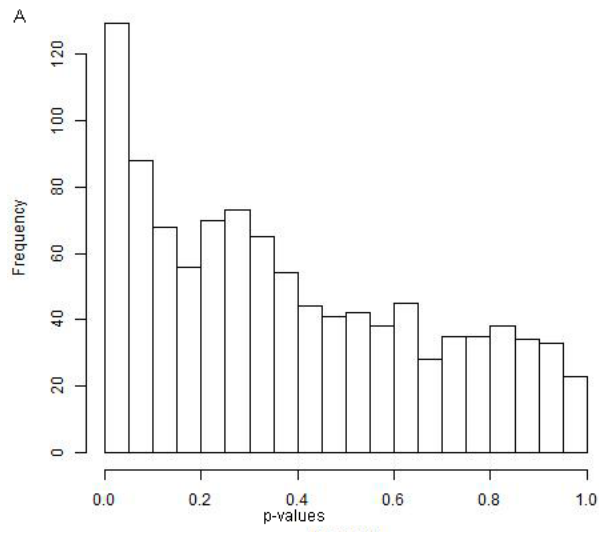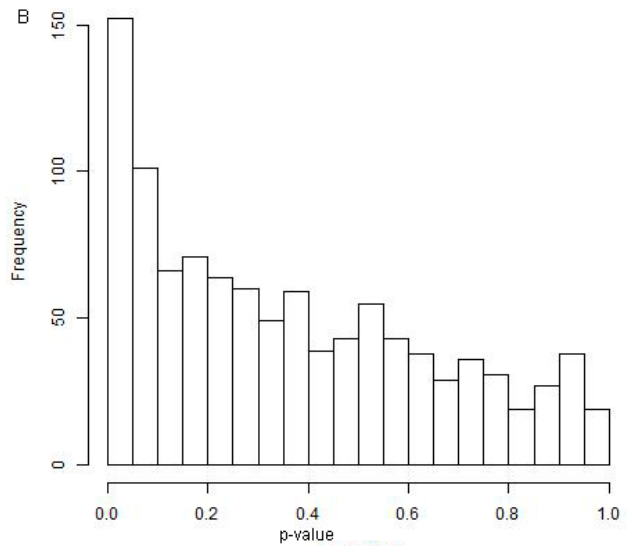

**Figure S10. ANOVA p-value histogram for le 3/el species -like level differences between the non-secretor and the secretors (A) and different genotypes (B) in HITChip analysis.**
